# Supplementary material for: Two-dimensional ReSe2 nanosheets as a high-performance photocatalyst
Source: Royal Society of Chemistry journal article supplement (doi:10.1039/d3nj01440a), 2023-01-01
Supplement: d3nj01440a1.pdf [file d3nj01440a1.pdf]

## **Two-dimensional ReSe<sub>2</sub> nanosheets as a high-performance photocatalyst**

Anamika Pandey<sup>†</sup>, Ranjana Verma<sup>†</sup> and Anchal Srivastava<sup>†\*</sup>

<sup>†</sup>Department of Physics, Institute of Science, Banaras Hindu University, Varanasi-221005, India

\*Corresponding author

Email: [anchalbhu@gmail.com](mailto:anchalbhu@gmail.com), [anchal@bhu.ac.in](mailto:anchal@bhu.ac.in)

Ph.: +91-9453203122

## Synthesis of ReSe<sub>2</sub> nanosheets

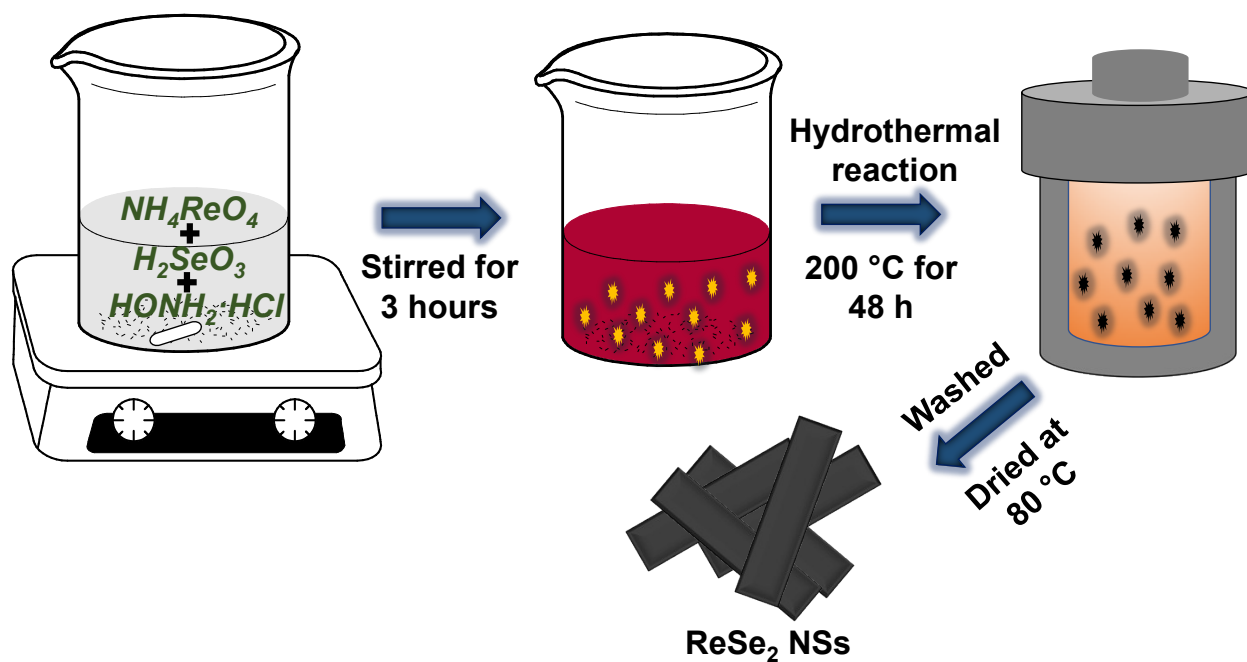

**Figure S1:** Schematic illustration for the synthesis of ReSe<sub>2</sub> nanosheets *via* hydrothermal method.

## SEM images of ReSe<sub>2</sub> nanosheets

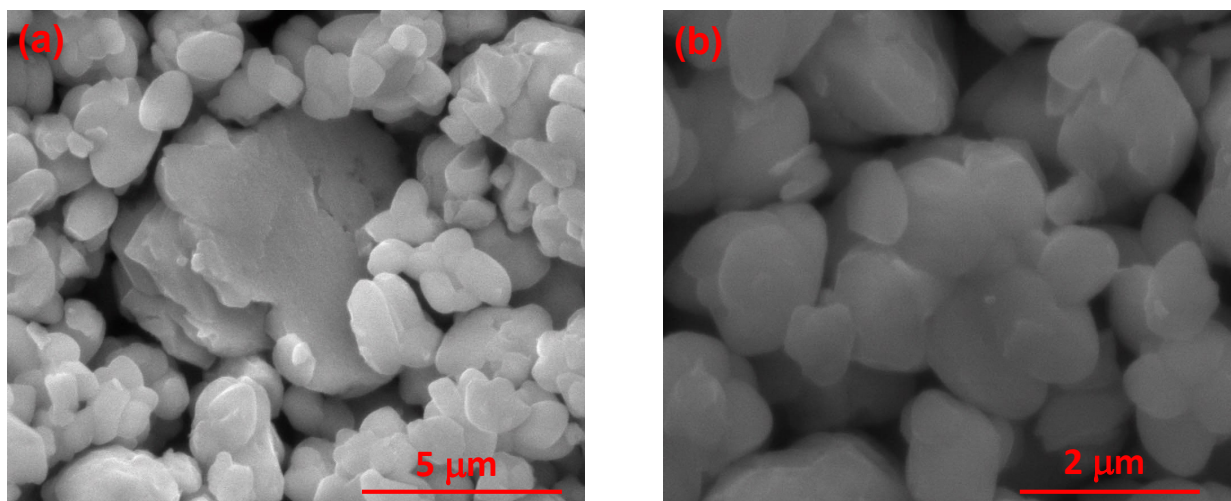

**Figure S2:** SEM images of ReSe<sub>2</sub> nanosheets at different magnifications.

### Trapping experiment of active species

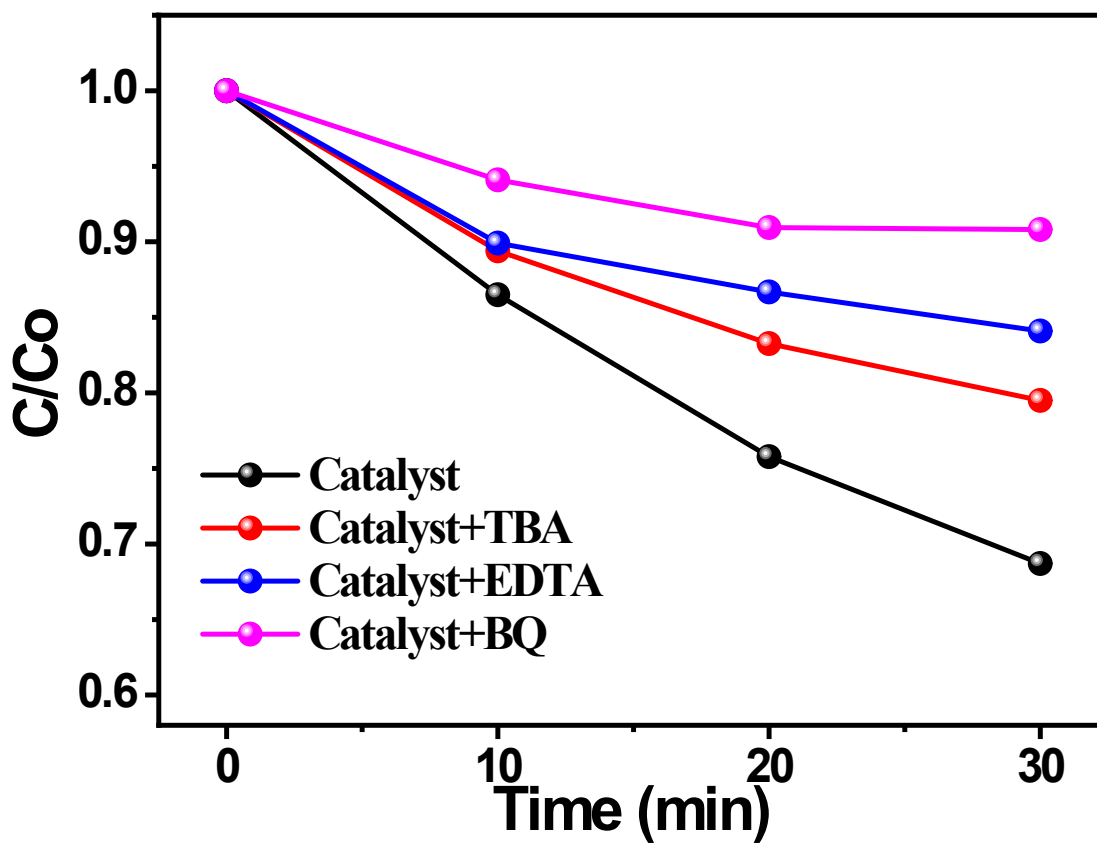

**Figure S3:** Photocatalytic activity of ReSe<sub>2</sub> nanosheets with TBA, EDTA, and BQ scavengers for degradation of Rh.B. under visible light.
